# Supplementary material
Source: PubMed Central journal article supplement (PMC4291203)
Supplement: Supp_Fig3.pdf [file Supp_Fig3.pdf]

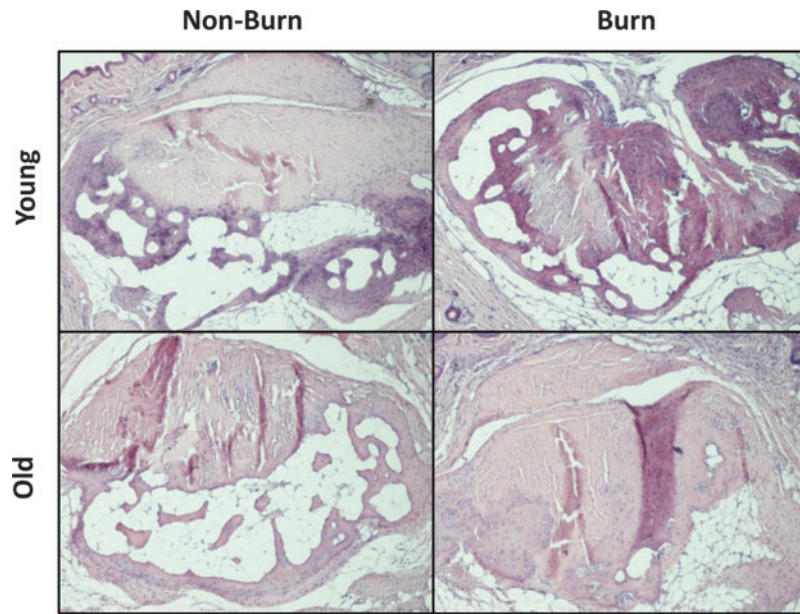

**SUPPLEMENTARY FIG. S3.** Bone marrow formation at the tenotomy site. H&E stain of the tenotomy site 15 weeks postinjury. More bone material developed in young burn mice than any other group. However, all mature HO at this time point demonstrated marrow filled cavities suggesting a multipotent cellular lineage.
