# Supplementary material
Source: PubMed Central journal article supplement (PMC4291203)
Supplement: Supp_Table1.pdf [file Supp_Table1.pdf]

SUPPLEMENTARY TABLE S1. QUANTITATIVE REAL-TIME POLYMERASE CHAIN REACTION PRIMERS

| <i>Gene</i>   | <i>Forward sequence</i> | <i>Reverse sequence</i> |
|---------------|-------------------------|-------------------------|
| <i>mGapdh</i> | CATGTTCCAGTATGACTCCACTC | GGCCTCACCCATTTGATGT     |
| <i>Mocn</i>   | CTGACAAAGCCTTCATGTCCAA  | GCGGGCGAGTCTGTTCACTA    |
| <i>mRunx2</i> | CGGTGCAAACCTTTCTCCAGGA  | GCACTCACTGACTCGGTTGG    |
| <i>MAIp</i>   | TGAGCGACACGGACAAGA      | GGCCTGGTAGTTGTTGTGAG    |

Sequences for forward and reverse primers chosen based on the PrimerBank sequences.
